# Supplementary material
Source: PubMed Central journal article supplement (PMC4703294)
Supplement: ja903879w_si_001.pdf [file ja903879w_si_001.pdf]

Supporting Information for

**Structural Examination of the Transient 3-Aminotyrosyl Radical on the  
PCET Pathway of *E. coli* Ribonucleotide Reductase by  
Multifrequency EPR Spectroscopy**

Mohammad R. Seyedsayamdost,<sup>†,&</sup> Tomislav Argirevic,<sup>§</sup> Ellen C. Minnihan<sup>†</sup>, JoAnne Stubbe<sup>\*,†,‡</sup>  
and Marina Bennati<sup>\*,§</sup>

*Department of Chemistry<sup>†</sup> and Biology<sup>‡</sup>, Massachusetts Institute of Technology, 77  
Massachusetts Avenue, Cambridge, MA 02139-4307, and Max Planck Institute  
for Biophysical Chemistry<sup>§</sup>, 37077 Göttingen, Germany*

*Marina.Bennati@mpibpc.mpg.de*

*<sup>&</sup>Current address: Department of Biological Chemistry and Molecular Pharmacology, 240  
Longwood Avenue, C1-609, Boston, MA 02115*

**Table S1.** Summary of EPR parameters (in MHz)<sup>a</sup> previously reported for an *o*-aminophenol radical.<sup>b</sup>

| Entry | Reference                       | g factor        | <sup>b</sup> A <sub>3</sub> <sup>H</sup> | <sup>b</sup> A <sub>4</sub> <sup>H</sup> | <sup>b</sup> A <sub>5</sub> <sup>H</sup> | <sup>b</sup> A <sub>6</sub> <sup>H</sup> | <sup>b</sup> A <sup>N</sup> | <sup>b</sup> A <sup>N-H</sup> |
|-------|---------------------------------|-----------------|------------------------------------------|------------------------------------------|------------------------------------------|------------------------------------------|-----------------------------|-------------------------------|
| 1     | Neta <i>et al.</i> <sup>c</sup> | 2.00372         | <0.28                                    | 12.1                                     | 2.8                                      | 8.2                                      | 13.3                        | 14.8 (2) <sup>d</sup>         |
| 2     | Loth <i>et al.</i> <sup>e</sup> | nr <sup>f</sup> | 1.29                                     | 6.5                                      | 1.5                                      | 6.1                                      | 12.4                        | 21.3/16.2                     |
| 3     | Loth <i>et al.</i> <sup>f</sup> | nr <sup>f</sup> | 0.28                                     | 8.4                                      | 3.9                                      | 7.0                                      | 12.6                        | 19.3/15.4                     |

<sup>a</sup> Hyperfine coupling constants were reported in Gauss, they have been converted to MHz as per 1 G=2.8 MHz. <sup>b</sup> See Figure S1 for numbering scheme of *o*-aminophenol radical. A<sub>x</sub><sup>H</sup> is the hyperfine coupling constant from the proton attached to C<sub>x</sub> of the *o*-aminophenol radical. A<sup>N</sup> is the coupling from the N-nucleus, A<sup>N-H</sup> is the coupling from the amine protons. <sup>c</sup> Generated by in situ radiolysis/EPR spectroscopy in water at room temperature (Ref. 36). <sup>d</sup> Two protons with identical hyperfine splitting constants. <sup>e</sup> Spectra obtained in CH<sub>2</sub>Cl<sub>2</sub>/THF at -61°C (Ref. 41). <sup>f</sup> Spectra obtained in CH<sub>3</sub>OH at -75°C (Ref. 41).

**Table S2.** UV spectral properties of authentic [<sup>14</sup>N]-NH<sub>2</sub>Y<sup>a</sup> and synthetic [<sup>15</sup>N]-NH<sub>2</sub>Y determined in H<sub>2</sub>O at 25°C.

| Protonation Form                 | Authentic NH <sub>2</sub> Y                                                             | Synthetic <sup>15</sup> N-NH <sub>2</sub> Y                               |
|----------------------------------|-----------------------------------------------------------------------------------------|---------------------------------------------------------------------------|
|                                  | λ <sub>max</sub> (nm) <sup>b</sup> , ε (M <sup>-1</sup> cm <sup>-1</sup> ) <sup>c</sup> | λ <sub>max</sub> (nm), ε (M <sup>-1</sup> cm <sup>-1</sup> ) <sup>c</sup> |
| H <sub>3</sub> N <sup>+</sup> -Y | 275 ± 1, 2150 ± 150                                                                     | 275 ± 1, 1900 ± 130                                                       |
| H <sub>2</sub> N-Y               | 289 ± 1, 3200 ± 220                                                                     | 289 ± 1, 3200 ± 220                                                       |
| H <sub>2</sub> N-Y <sup>-</sup>  | 303 ± 1, 5100 ± 360                                                                     | 303 ± 1, 4700 ± 330                                                       |

<sup>a</sup> “Authentic” [<sup>14</sup>N]-NH<sub>2</sub>Y was obtained from Sigma-Aldrich. <sup>b</sup> Estimated error based on accuracy of spectrophotometer. <sup>c</sup> Estimated error based on accuracy of spectrophotometer and microbalance weight measurements.

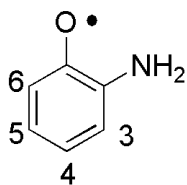

**Figure S1.** Numbering scheme for the spectral data on the *o*-aminophenol radical data in Table S1. Accordingly,  $A_3^H$  in Table S1 corresponds to the hyperfine coupling constant from the proton attached to  $C_3$ .

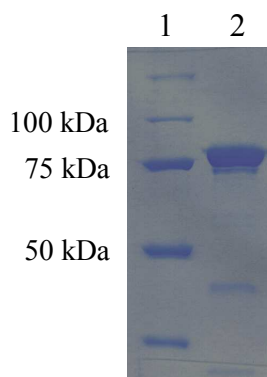

**Figure S2.** SDS PAGE analysis of purified  $[^{15}\text{N}]\text{-NH}_2\text{Y}_{730}\text{-}\alpha 2$ . Lane (1), MW marker. The MW for the relevant bands is indicated. Lane (2), purified  $\text{Y}_{730}\text{NH}_2\text{Y-}\alpha 2$  (5  $\mu\text{g}$ ).

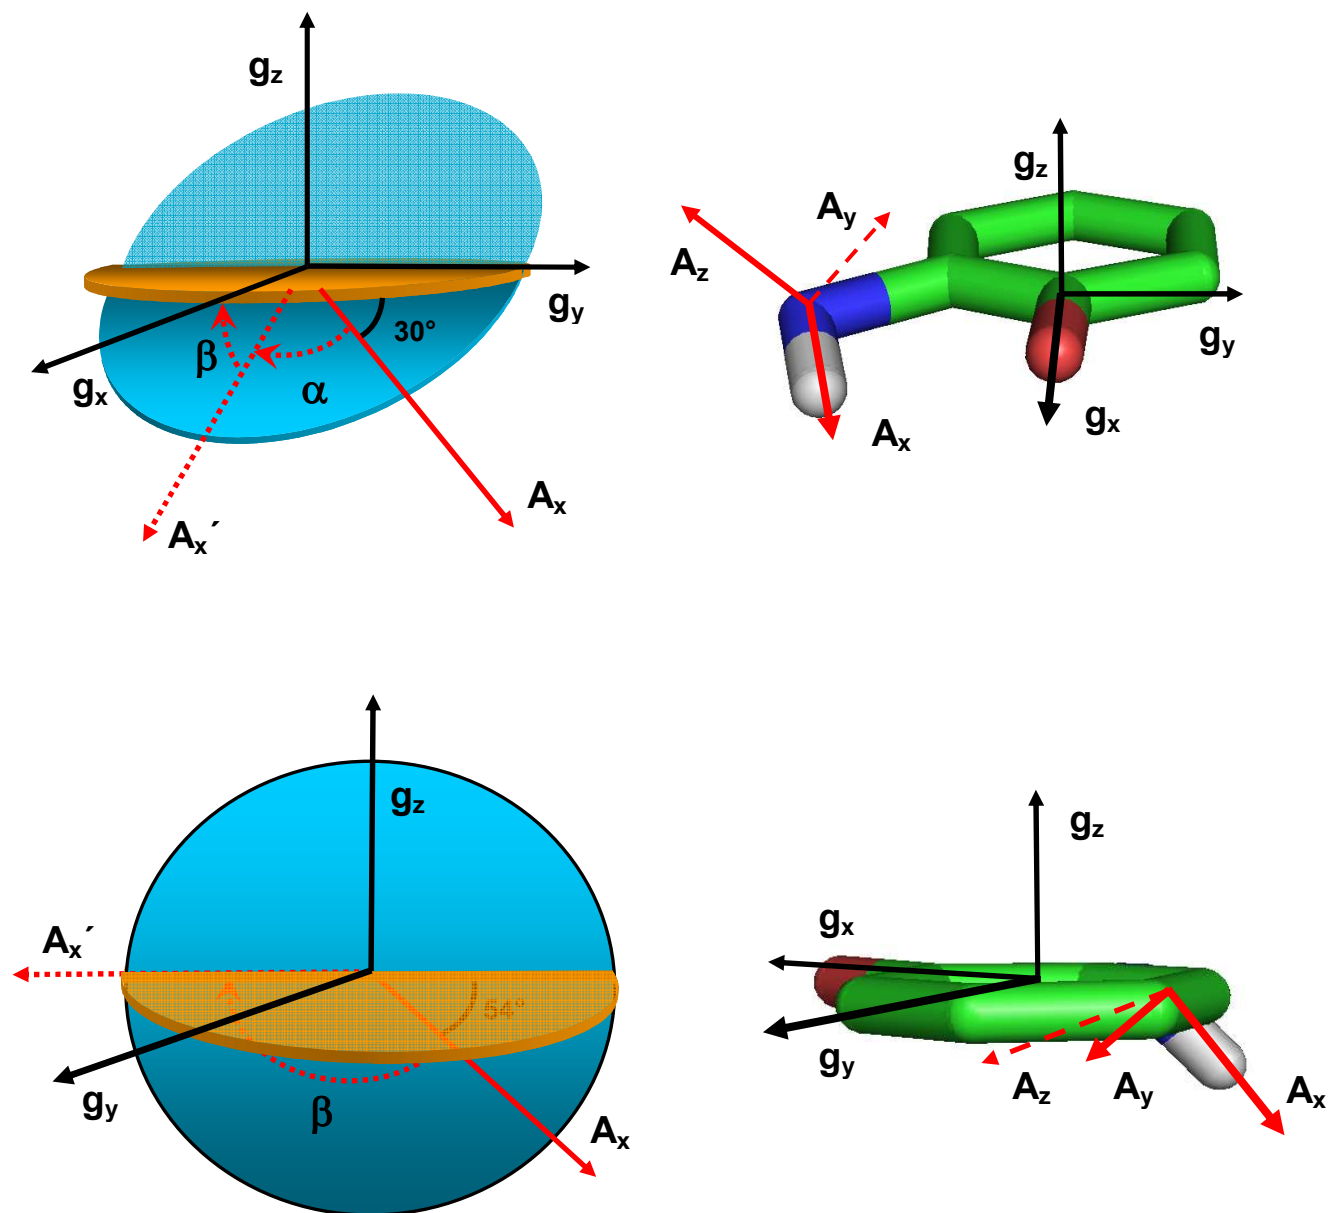

**Figure S3.** Euler rotations and A tensors for N-H(1) (top) and N-H(2) (bottom). (Top) Two rotations are required to co-linearize the A and g tensor axes. The first rotation occurs about  $A_z$  (Euler angle  $\alpha$ , here negative) and generates  $A_x'$  co-linearizing  $g_y$  and  $A_y$ . The second rotation occurs about  $A_y'$  (or  $g_y$ ) and corresponds to Euler angle  $\beta$  (here also negative). This leads to co-linear  $g_x/A_x$  and  $g_z/A_z$  axes. (B) In case of N-H(2), the first rotation occurs about  $A_y$  and moves  $A_x$  to  $A_x'$  (Euler angle  $\beta$ , here negative). The second rotation occurs about  $A_z$  (Euler angle  $\gamma$ , here negative). See Table 1 for values of  $\alpha$ ,  $\beta$  and  $\gamma$  for each proton. The negative values of the angles are due to the requirement of counter-clockwise rotations in the Euler convention. For clarity, the translation of the other tensor axes after each rotation is not shown (i.e.  $A_y'$  and  $A_z'$ ).

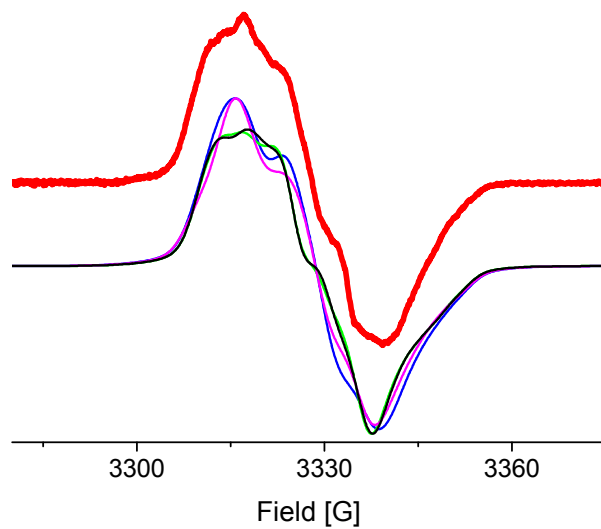

**Figure S4:** Simulations of the 9 GHz CW-EPR spectrum of  $[^{15}\text{N}]\text{-NH}_2\text{Y}_{730}\bullet$  for the four possible combinations of the  $\beta$  angle signs for the two  $\text{NH}_2$  protons, i.e. ++ (green), +- (blue), -+ (magenta), -- (black). The red bold trace is the observed 9 GHz spectrum of  $[^{15}\text{N}]\text{-NH}_2\text{Y}_{730}\bullet$  in protonated buffer.

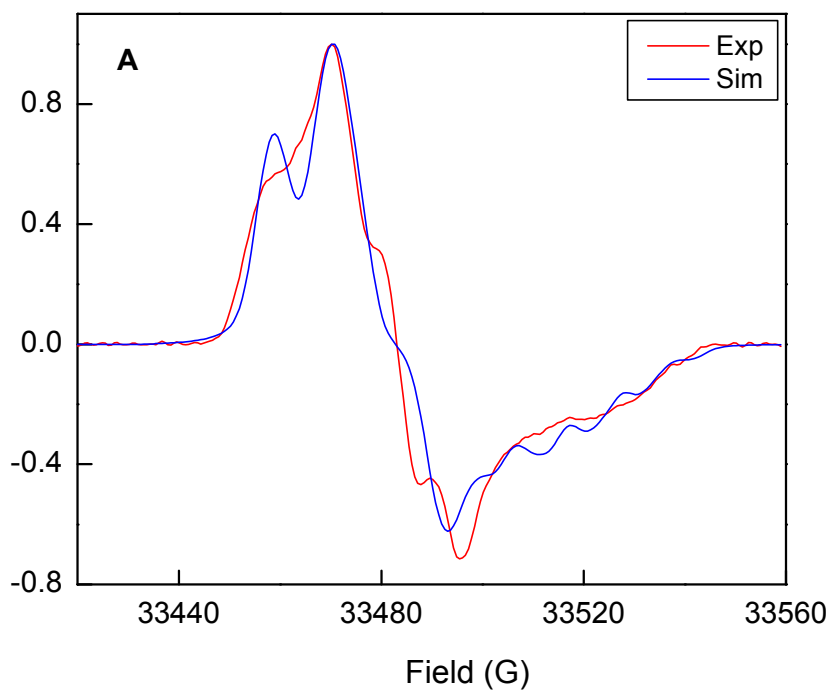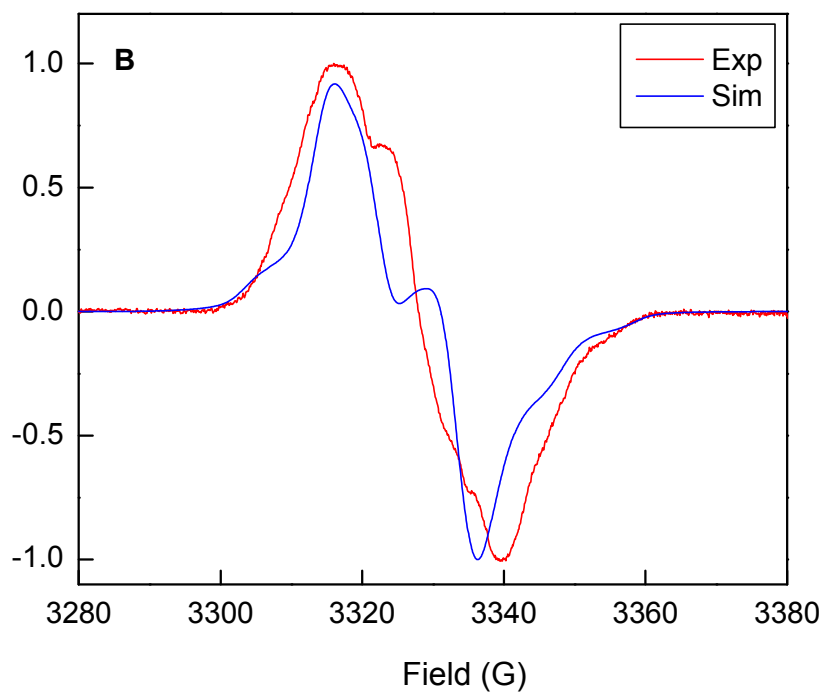

**Figure S5:** Observed 94 GHz (A) and 9 GHz (B) EPR spectrum of  $[^{14}\text{N}]\text{-NH}_2\text{Y}_{730}\cdot\text{-}\alpha 2$  (red trace) and computation of the spectrum of an ideal  $sp^2$ -hybridized nitrogen in  $\text{NH}_2\text{Y}\cdot$  (blue trace). The poor simulation of the data here contrasts to those in Figs. 5-7, where an  $sp^3$ -hybridized nitrogen was used.

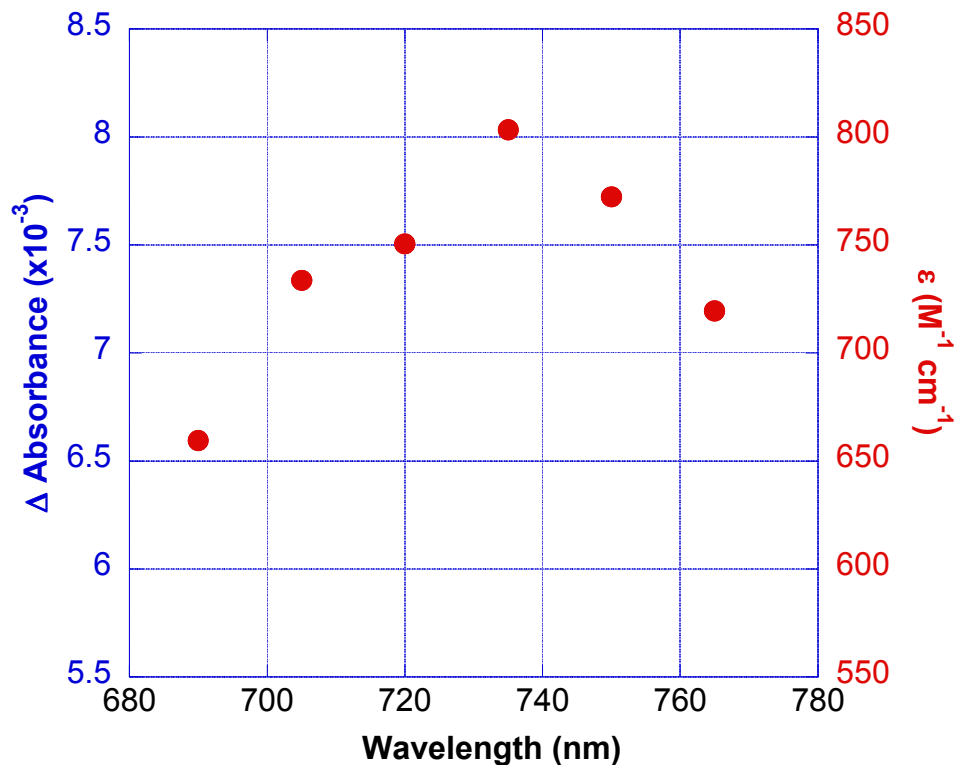

**Figure S6.** Spectral reconstruction of the UV-vis spectrum of the broad, long wavelength feature observed upon stopped-flow reaction of Y<sub>730</sub>NH<sub>2</sub>Y-a2 with β<sub>2</sub>, CDP, and ATP. Y<sub>730</sub>NH<sub>2</sub>Y-a2 and ATP were rapidly mixed with β<sub>2</sub> and CDP in a 1:1 ratio to give final concentrations of 30 μM, 3 mM, 30 μM, and 1 mM, respectively. Reactions were conducted at 25 °C and monitored over 5 seconds in 15 nm intervals. At each wavelength, kinetic traces were averaged and fit bi-exponentially. The total change in absorbance over the timecourse (left axis, blue) was used to determine approximate extinction coefficients (right axis, red) by determining the amount of NH<sub>2</sub>Y• formed under identical experimental conditions and assuming that the broad, long-wavelength feature and NH<sub>2</sub>Y• form in an equimolar ratio.

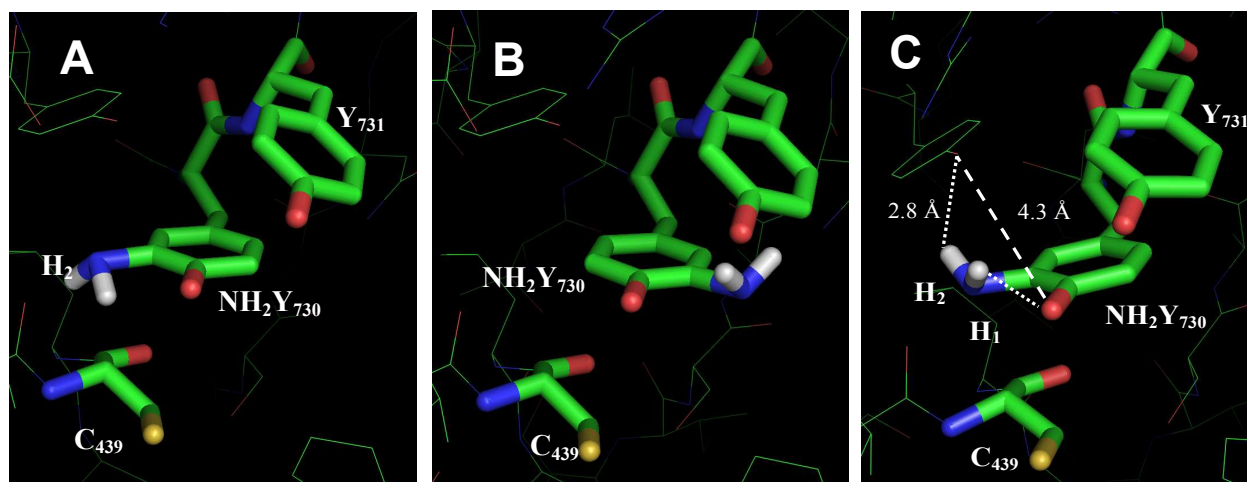

**Figure S7:** Models of the  $Y_{731}$ – $NH_2Y_{730}$ – $C_{439}$  pathway. These orientations are consistent with the EPR data, but result in steric clashes within  $\alpha 2$  and are inconsistent with recent structural data. In (A) the amino group is sterically hindered by the backbone carbonyl of  $L_{438}$  (the distance to  $H_2$  is 1.7 Å) and in (B) it is too close to residue  $Y_{731}$ . (C) is inconsistent with the recent structure of  $NH_2Y$ - $\alpha 2$  or  $NO_2Y$ - $\alpha 2$  (Uhlir & Stubbe, unpublished results).

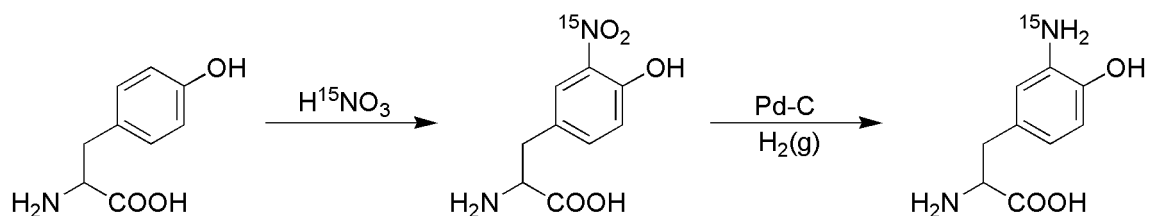

**Scheme S1.** Synthetic scheme used for preparation of  $[^{15}N]$ - $NH_2Y$ . See Methods for details.

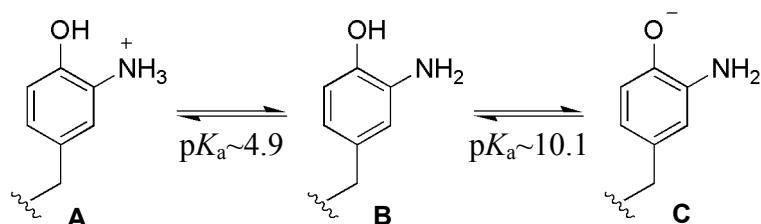

**Scheme S2.** Different protonation states and  $pK_a$ s of  $NH_2Y$ . Species A, B, and C have absorption maxima at 275, 289, and 303 nm, respectively. The  $pK_a$ s for conversion of A to B and B to C are from Refs. 31 and 32.
